# Supplementary material for: Vertical Patterns of Soil Bacterial and Fungal Communities along a Soil Depth Gradient in a Natural Picea crassifolia Forest in Qinghai Province, China
Source: MDPI journal article supplement (doi:10.3390/f14051016), 2023-05-15
Supplement: s1 [file s1]

## Online Supporting information for

The vertical patterns of soil bacterial and fungal communities along a soil depth gradient in a natural *Picea crassifolia* forest of Qinghai Province, China

Lei Hu <sup>1†</sup>, Xin Wang <sup>1†</sup>, Xiaoyan Song <sup>1</sup>, Di Dai <sup>1</sup>, Keyu Chen <sup>1</sup>, Luming Ding <sup>1</sup>, Abraham Allan Degen <sup>2</sup>, Changting Wang <sup>1\*</sup>

### Supplementary tables:

**Table S1.** The ANOVA for soil physicochemical properties and microbial community characteristics along soil depths

| Variables           |                          | Soil depths (fixed factor) |         |
|---------------------|--------------------------|----------------------------|---------|
|                     |                          | F                          | P       |
| Soil properties     | Soil pH                  | 26.999                     | < 0.001 |
|                     | Soil bulk density        | 0.172                      | 0.914   |
|                     | SOC                      | 9.874                      | < 0.001 |
|                     | TN                       | 13.052                     | < 0.001 |
|                     | TP                       | 2.939                      | 0.058   |
|                     | C/N                      | 3.995                      | 0.022   |
|                     | C/P                      | 9.191                      | 0.001   |
|                     | N/P                      | 14.23                      | < 0.001 |
| Relative abundance  | Acidobacteria            | 0.069                      | 0.976   |
|                     | Verrucomicrobia          | 4.814                      | 0.011   |
|                     | Proteobacteria           | 0.906                      | 0.456   |
|                     | Ascomycota               | 0.351                      | 0.789   |
|                     | Basidiomycota            | 0.148                      | 0.930   |
| $\alpha$ diversity  | Bacterial OTU            | 18.088                     | < 0.001 |
|                     | Bacterial Chao1          | 10.127                     | < 0.001 |
|                     | Bacterial PD             | 13.231                     | < 0.001 |
|                     | Bacterial Shannon-Wiener | 8.566                      | 0.001   |
|                     | Fungal OTU               | 3.363                      | 0.039   |
|                     | Fungal Chao1             | 4.492                      | 0.014   |
|                     | Fungal PD                | 0.573                      | 0.639   |
|                     | Fungal Shannon-Wiener    | 1.121                      | 0.364   |
| Potential functions | Endophyte                | 2.242                      | 0.115   |
|                     | Arbuscular Mycorrhizal   | 0.736                      | 0.543   |
|                     | Ectomycorrhizal          | 0.799                      | 0.509   |
|                     | Undefined Saprotroph     | 0.598                      | 0.624   |

**Table S2.** The characteristics of soils and roots along the soil depths

| Soil depth | Soil pH                | Soil bulk density<br>(g cm <sup>-3</sup> ) | SOC<br>(g kg <sup>-1</sup> ) | TN<br>(g kg <sup>-1</sup> ) | TP<br>(g kg <sup>-1</sup> ) | C/N                     | C/P                       | N/P                     |
|------------|------------------------|--------------------------------------------|------------------------------|-----------------------------|-----------------------------|-------------------------|---------------------------|-------------------------|
| 0-10 cm    | 5.93±0.39 <sup>c</sup> | 0.83±0.31                                  | 116.8±13.60 <sup>a</sup>     | 8.42±0.09 <sup>a</sup>      | 0.60±0.08 b                 | 14.1±0.06 <sup>b</sup>  | 195.5±29.20 <sup>a</sup>  | 14.1±1.71 <sup>a</sup>  |
| 10-20 cm   | 6.56±0.14 <sup>b</sup> | 0.86±0.31                                  | 102.0±12.35 <sup>ab</sup>    | 6.00±0.36 <sup>b</sup>      | 0.71±0.12 <sup>a</sup>      | 14.9±0.93 <sup>ab</sup> | 149.8±42.92 <sup>b</sup>  | 8.76±2.06 <sup>b</sup>  |
| 20-30 cm   | 6.62±0.03 <sup>b</sup> | 0.90±0.32                                  | 94.4±20.01 <sup>b</sup>      | 6.06±1.76 <sup>b</sup>      | 0.73±0.06 <sup>a</sup>      | 15.2±0.39 <sup>a</sup>  | 132.3±39.44 <sup>bc</sup> | 8.52±3.13 <sup>bc</sup> |
| 30-50 cm   | 7.06±0.16 <sup>a</sup> | 0.95±0.32                                  | 67.6±17.24 <sup>c</sup>      | 3.83±1.80 <sup>c</sup>      | 0.72±0.06 <sup>a</sup>      | 15.3±0.83 <sup>a</sup>  | 93.5±20.57 <sup>c</sup>   | 5.28±2.38 <sup>c</sup>  |

Means with different superscript letters within a column differ from each other ( $P < 0.05$ ). SOC, soil organic carbon; TN, total nitrogen; TP, total phosphorus; C/N, the ratio of SOC/TN; C/P, the ratio of SOC/TP; N/P, the ratio of TN/TP.

Figure S1

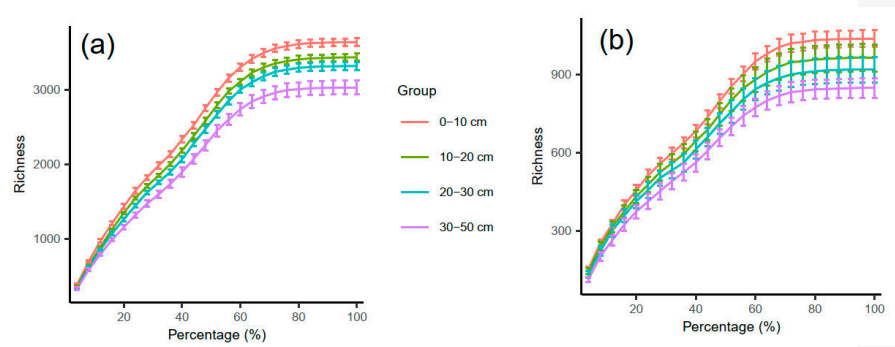

Figure S1 The rarefaction curves of soil bacteria (a) and fungi (b).

## Soil bacteria and fungi analysis using Illumina MiSeq sequencing

The V4-V5 region of bacterial 16S rRNA and the ITS region of fungal rRNA were amplified via polymerase chain reaction (PCR) with the primers 515F (5'-GTGCCAGCMGCCGCGG-3') and 909R (5'-CCCGYCAATTCMTTTRAGT-3') for bacteria (Tamaki et al., 2011), and ITS3 (5'-TCCGTAGGTGAACCTGCGG-3') and ITS4 (5'-TCCTCCGCTTATTGATATGC-3') for fungi. The PCR mixture (25 µL) was prepared with 10× Ex Taq buffer (2.5 µL), 25 mM MgCl<sub>2</sub> (2 µL), 2.5 mM dNTPs (2 µL), 10 nM forward primer and reverse primer (each 1 µL), 0.5 UExTaq polymerase (TaKaRa, Dalian, China) (0.2 µL), 10 ng·µL<sup>-1</sup> soil genomic DNA (5 µL), and ddH<sub>2</sub>O (11.3 µL). The PCR amplification used a Bio-Rad C1000 Touch Thermal Cycler system (Bio-Rad, Hercules, CA, USA). The procedures for amplification of bacteria samples were as follows: denaturation at 95 °C, 35 cycles of denaturation at 94 °C, 50 °C for 1 min, 72 °C for 1 min, and a final extension at 72 °C for 10 min. The procedures for amplification of fungal samples were as follows: 95 °C for 5 min, 35 cycles of 94 °C for 30 s, 52 °C for 30 s, 72 °C for 45 s, and 72 °C for 10 min. The purified amplicons were pooled equally and sequenced on an Illumina MiSeq platform according to standard protocols.

## Processing of sequenced data

The MiSeq sequenced data were processed using the Quantitative Insights into Microbial Ecology (QIIME) pipeline version 1.7.0 (<http://qiime.org/tutorials/tutorial.html>). The original sequences were sorted based on the unique sample barcodes and trimmed for sequence quality (length > 300 bp, average base quality score > 30) using the QIIME pipeline [1]. Chimaera sequences were removed using the UCHIME algorithm [2]. The sequences were clustered using the complete-linkage clustering method incorporated in the QIIME pipeline [3]. Sequences were clustered into operational taxonomic units (OTUs) based on a similarity threshold of 97%. Taxonomy was assigned using the Ribosomal Database Project Classifier. The original sequence data are available at the European Nucleotide Archive by accessing PRJEB11649 (<http://www.ebi.ac.uk/ena/data/view/PRJEB11649>).

**Commented [I1]:** Here, we have revised the reference numbers

## References

1. Segata, N.; Izard, J.; Waldron, L.; Gevers, D.; Miropolsky, L.; Garrett, W.S.; Huttenhower, C. Metagenomic biomarker discovery and explanation. *Genome Biol.* **2011**, *12*, 60. <https://doi.org/10.1186/gb-2011-12-6-r60>.
2. Edgar, R.C.; Haas, B.J.; Clemente, J.C.; Quince, C.; Knight, R. Uchime improves sensitivity and speed of chimera detection. *Bioinformatics.* **2011**, *27*, 2194–2200. <https://doi.org/10.1093/bioinformatics/btr381>.

**Commented [M2]:** Citations and References in Supplementary files are permitted provided that they also appear in the reference list (manuscript).

3. Caporaso, J.G.; Lauber, C.L.; Walters, W.A.; Berg, D.L.; Huntley, J.; Fierer, N.; Owens, S.M.; Betley, J.; Fraser, L.; Bauer, M. Ultra-high-throughput microbial community analysis on the illumina hiseq and miseq platforms. *ISME J.* **2011**, *6*, 1621–1624. <https://doi.org/10.1038/ismej.2012.08>.
